# Supplementary material for: A novel series of compositionally biased substitution matrices for comparing Plasmodium proteins
Source: Springer Nature journal article supplement (doi:10.1186/1471-2105-9-236), 2008-05-16

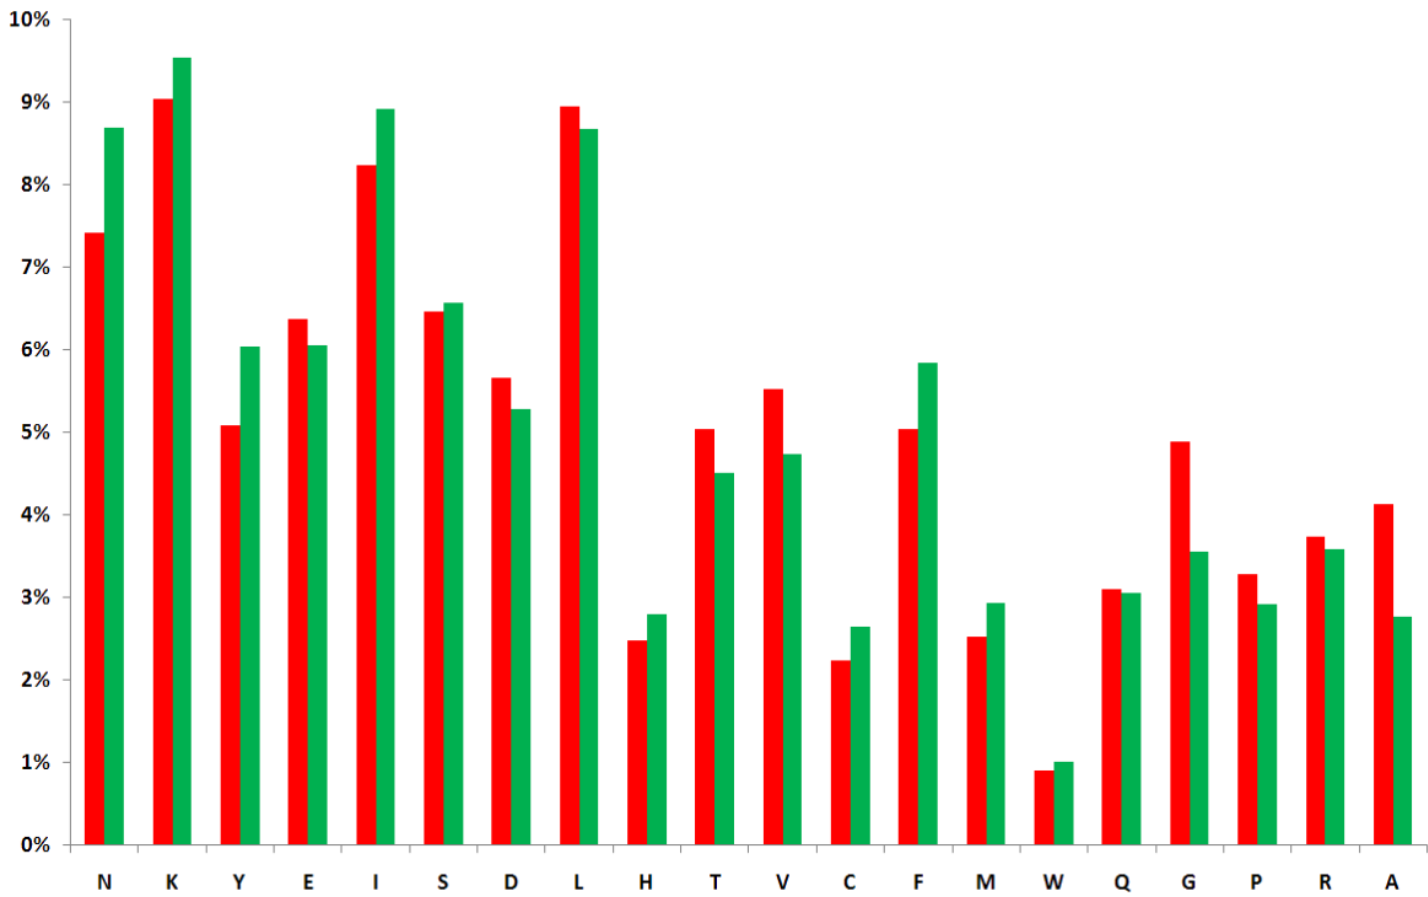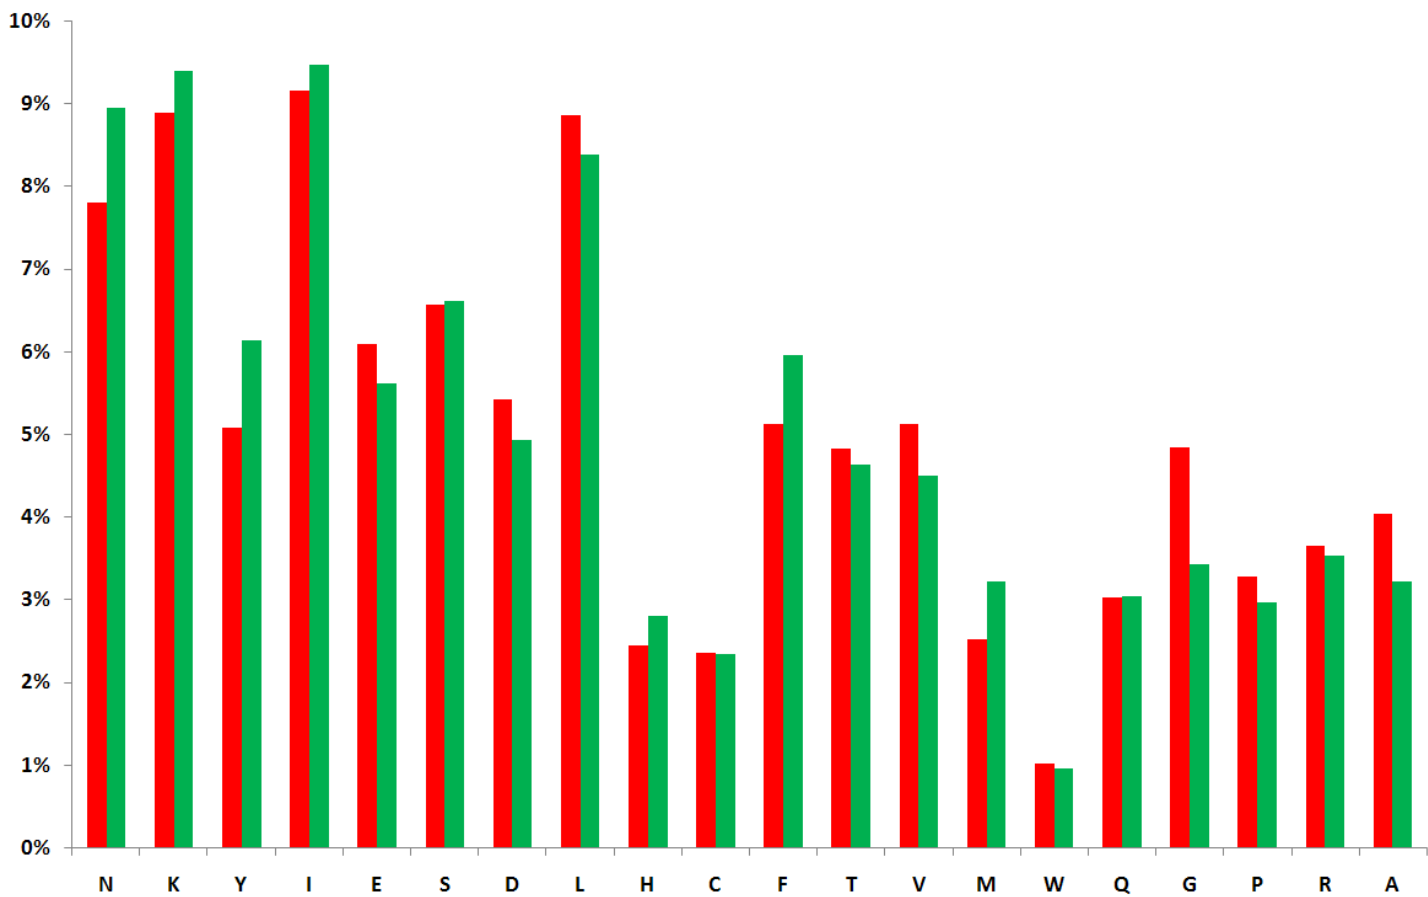

Supplement: Additional file 1 [file 1471-2105-9-236-s1.pdf]
